# Supplementary material
Source: publisher figshare collection journal article supplement (https://acs.figshare.com/ndownloader/files/27409898)
Supplement: Supplementary file 1 [file 27409898]

**ACS LiveSlides VIDEO RELEASE**

**AUTHOR AUTHORIZATION FOR USE OF VOICE  
AND  
WARRANTY OF PERMISSIONS**

**AUTHORIZATION FOR USE OF VOICE AND/OR LIKENESS**

I hereby grant to the American Chemical Society (ACS) the right and permission to record, use, publish, post on an ACS Web site audio/video slideshow presentations that include the recording of voice, the transcription of remarks, and likeness of the authors of published articles. Such right and permission includes, but is not limited to, the authors' names, recorded voice or video, photograph or likeness, biographical information, or any material based upon or derived therefrom.

ACS shall have the right to use any material in the published video slideshow presentation, including, but not limited to, for print or online marketing and promotional purposes, provided that the scientific meaning and integrity of the content is not compromised.

I hereby grant a non-exclusive, unrestricted, worldwide, perpetual license to ACS to use these materials as stated above. I understand that I have no right of approval, and no claim for compensation for the use of this material.

I understand that the voice used in the presentation is limited to only the author or coauthors of a particular manuscript.

**WARRANTY OF PERMISSIONS**

I hereby warrant that I have obtained written permission from non-ACS copyright owners/publishers of content included in the video. I understand that all remaining content included in the presentation is limited to content that appears in my corresponding manuscript.

I also warrant that all slideshow content conforms to ACS journal requirements, pursuant to the document entitled "ACS LiveSlides Guidelines for Authors" attached here. This includes obtaining photograph permissions and accompanying model releases, if photographs are being used.

Copies of all non-ACS permissions are required to be uploaded with this form.

X I have read and agree to the above terms.

Name: Nadiia Gumerova Email Address: nadiia.gumerova@univie.ac.at

Signature: Nadiia Gumerova Date: 23.03.2021
